# Supplementary material for: Multifunctional NO supramolecular nanomedicine for thrombus risk reduction and intimal hyperplasia inhibition
Source: Royal Society of Chemistry journal article supplement (doi:10.1039/d4tb02271h), 2024-12-10
Supplement: d4tb02271h1.pdf [file d4tb02271h1.pdf]

## **Multifunctional NO supramolecular nanomedicine for thrombus risk reduction and intimal hyperplasia inhibition**

*Kuangshi Zhou<sup>a,b,c,#</sup>, Chengchen Huang<sup>a,b,c,#</sup>, Jian Li<sup>a,b,c,d,#</sup>, Wenbin Dai<sup>d</sup>, Zhaoyang Lu<sup>a,b,c</sup>, Fan Jia<sup>a,b,c</sup>, Qiao Jin<sup>d</sup>, Min Shang<sup>a,b,c,\*</sup>, Jian Ji<sup>d,\*</sup>, and Guosheng Fu<sup>a,b,c,\*</sup>*

a. Department of Cardiology, Sir Run Run Shaw Hospital, Zhejiang University School of Medicine, Hangzhou 310016, China

b. Zhejiang Key Laboratory of Cardiovascular Intervention and Precision Medicine, Hangzhou 310016, China

c. Engineering Research Center for Cardiovascular Innovative Devices of Zhejiang Province, Hangzhou 310016, China

d. MOE Key Laboratory of Macromolecule Synthesis and Functionalization of Ministry of Education, Department of Polymer Science and Engineering, Zhejiang University, Hangzhou 310058, P. R. China

*# These authors contributed equally to this work*

*\*To whom correspondence should be addressed: Min Shang: ...@zju.edu.cn; Jian Ji: jijian@zju.edu.cn; Guosheng Fu: fugs@zju.edu.cn*

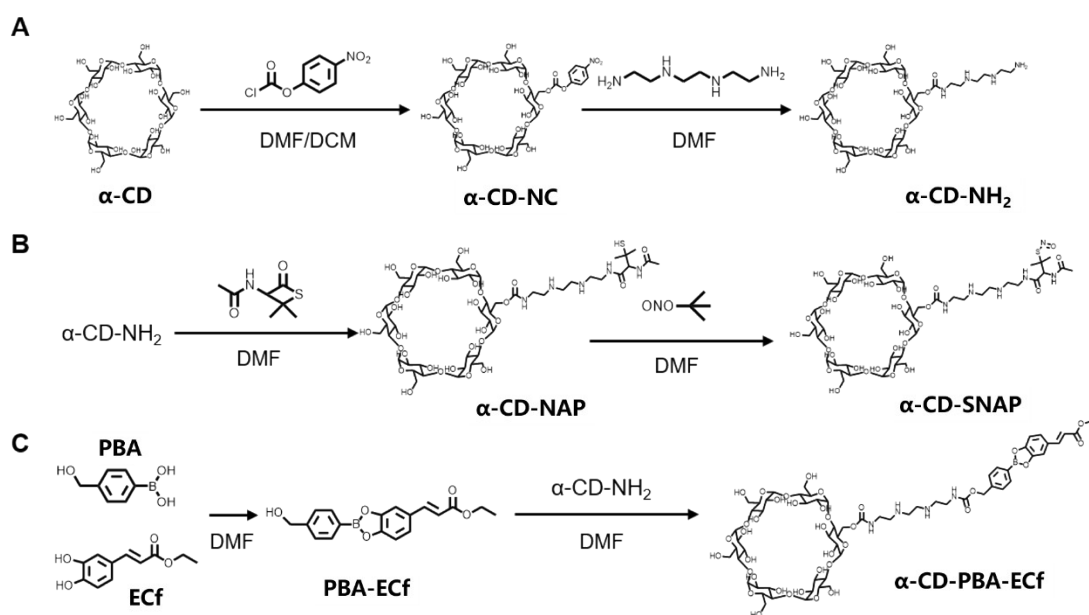

**Scheme S1. Synthesis routines of  $\alpha$ -CD based NO donor  $\alpha$ -CD-NO and boronic acid ester  $\alpha$ -CD-PBA-Ecf**

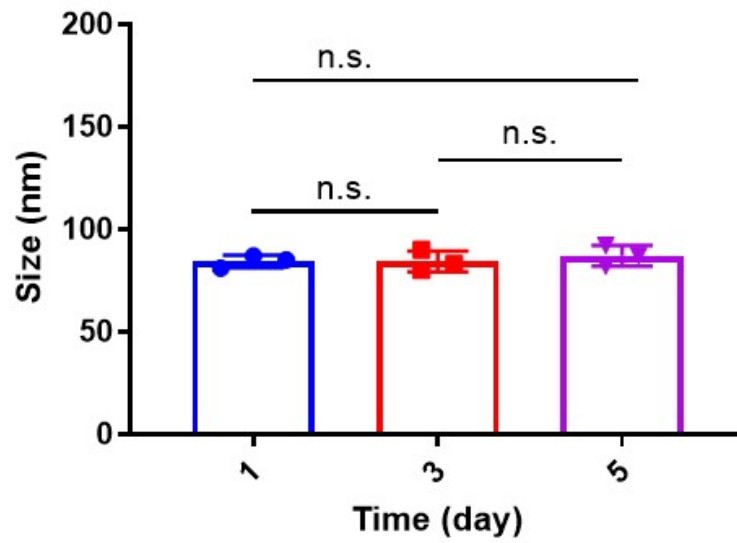

Figure S1. Size profiles of targeting nanoparticles in PBS over time. Data are presented as mean  $\pm$  SD (n=3). \*p < 0.05, \*\*p < 0.01, \*\*\*p < 0.001, \*\*\*\*p < 0.0001.

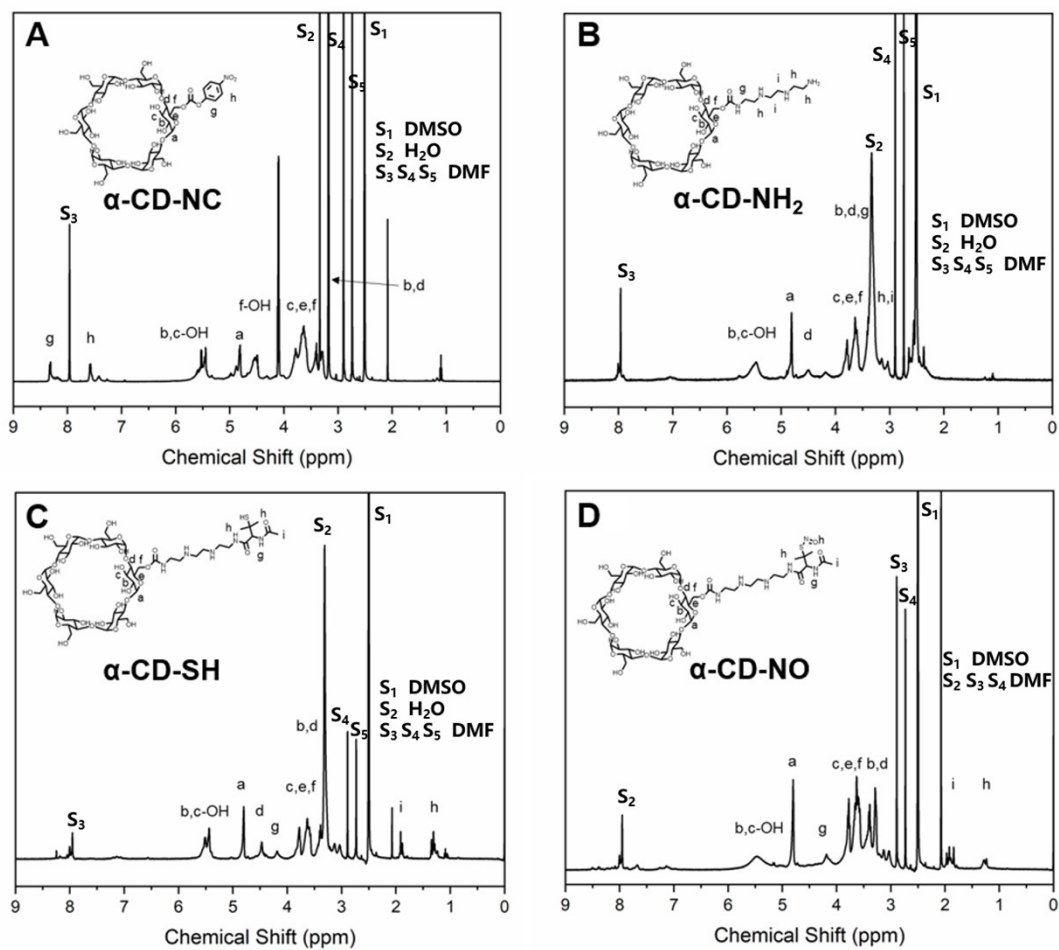

**Figure S2.** <sup>1</sup>H NMR spectrum of A)  $\alpha$ -CD-NC, B)  $\alpha$ -CD-NH<sub>2</sub>, C)  $\alpha$ -CD-NAP and D)  $\alpha$ -CD-SNAP

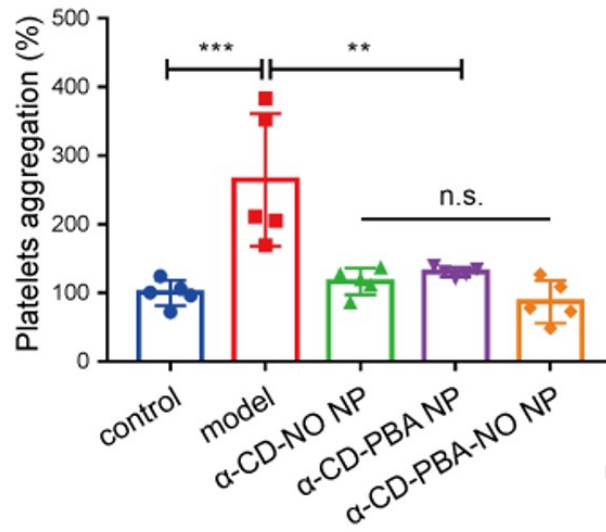

**Figure S3. Quantitative statistical results of fluorescent intensity of aggregated platelets from Figure 2 D. Data are presented as mean  $\pm$  SD (n=5). \* $p$  < 0.05, \*\* $p$  < 0.01, \*\*\* $p$  < 0.001, \*\*\*\* $p$  < 0.0001. The model referred to calcium stimulation.**

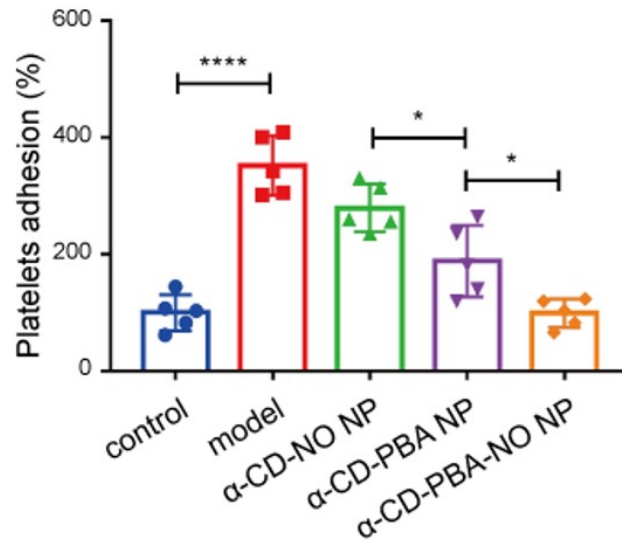

**Figure S4. Quantitative statistical results of fluorescent intensity of adhered platelets from Figure 2E. Data are presented as mean  $\pm$  SD (n=5). \* $p < 0.05$ , \*\* $p < 0.01$ , \*\*\* $p < 0.001$ , \*\*\*\* $p < 0.0001$ . The model referred to calcium stimulation.**

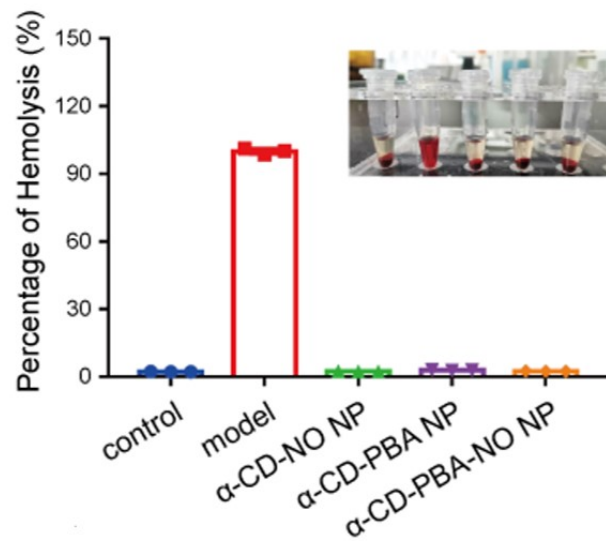

**Figure S5. Hemolysis ratio of different nanomedicines. Inlet, digital pictures of tested blood samples with different treatment. Data are presented as mean  $\pm$  SD (n=3). \* $p < 0.05$ , \*\* $p < 0.01$ , \*\*\* $p < 0.001$ , \*\*\*\* $p < 0.0001$ . The model referred to 1% triton treatment.**

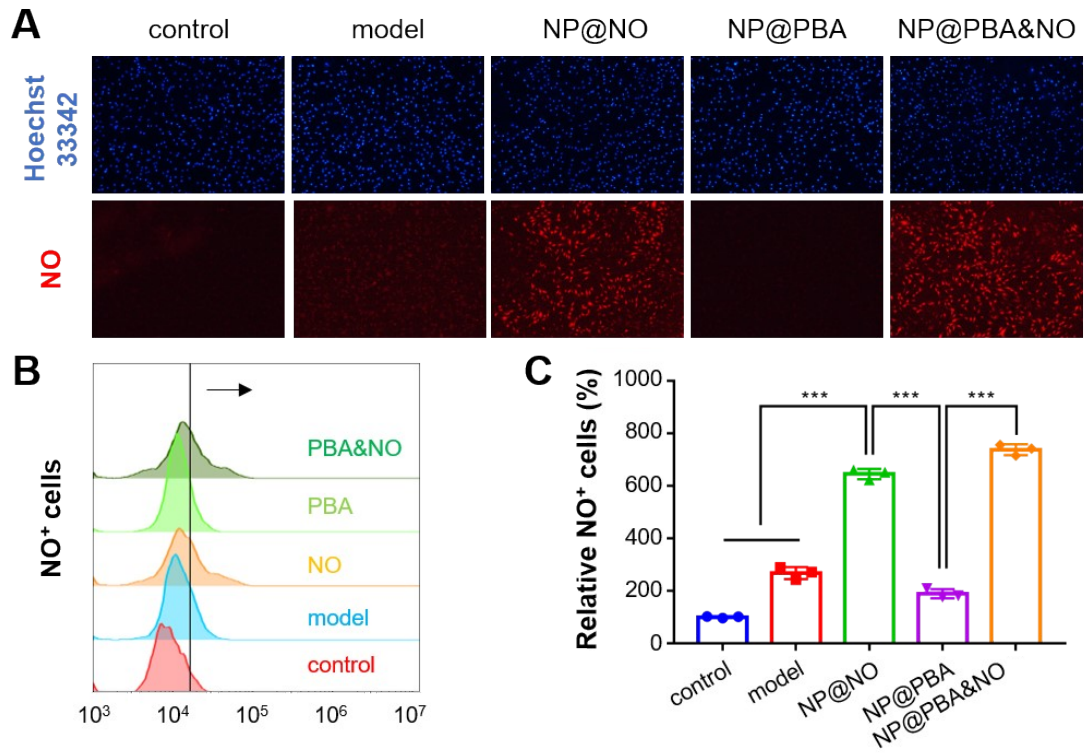

**Figure S6. Intracellular detection of NO release from different nanoprodrugs A) fluorescent images, B) profiles of flowcytometry and C) ratio of increase in NO positive cells calculated from B. The model referred to H<sub>2</sub>O<sub>2</sub> stimulation.**



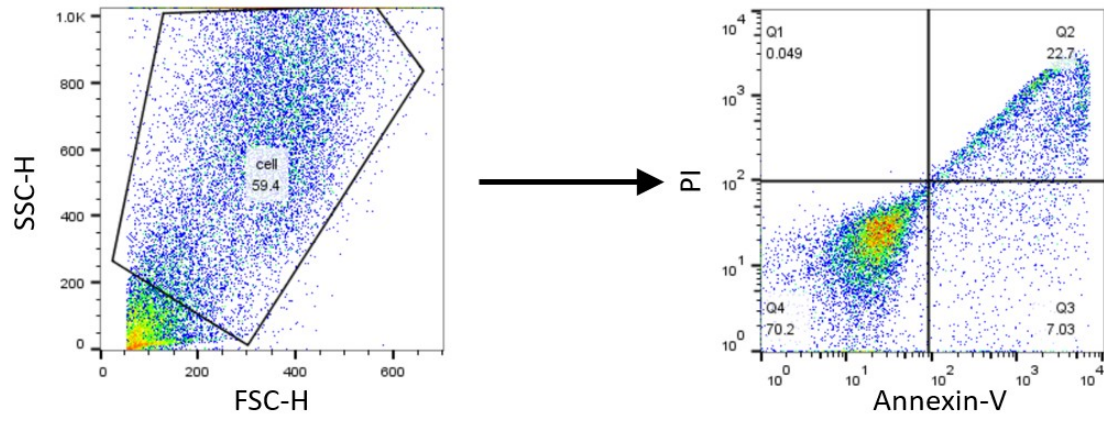

**Figure S7. Gating strategy for detection of apoptosis cells of HASMCs after different treatments by Annexin V-FITC and PI assay.**

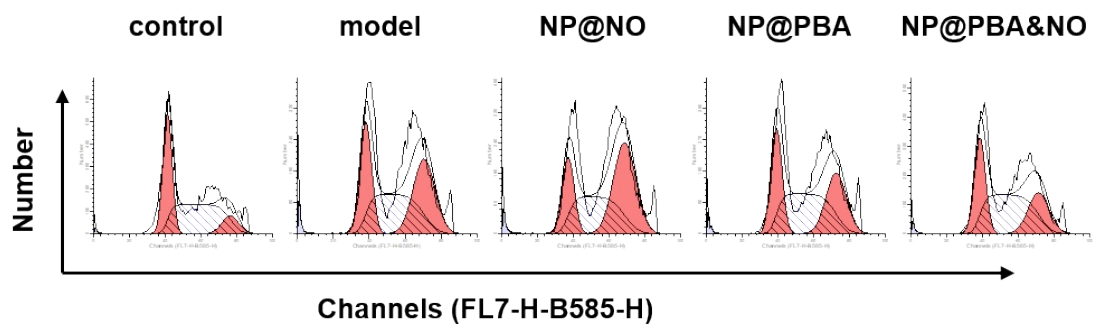

**Figure S8. Profiles of flowcytometry on cell cycle after different treatments. The model referred to  $H_2O_2$  stimulation.**

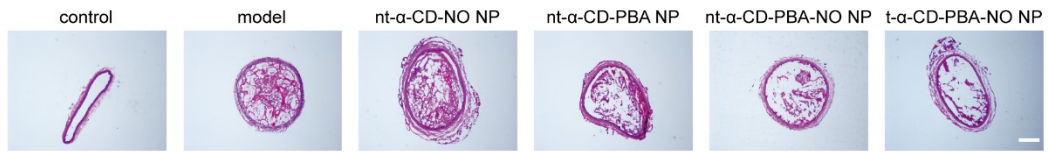

**Figure S9. Representative H&E images of vascular acute thrombus tissue slices induced by FeCl<sub>3</sub>. Scale bar, 250μm. The model referred to group with infusion of FeCl<sub>3</sub> solution.**

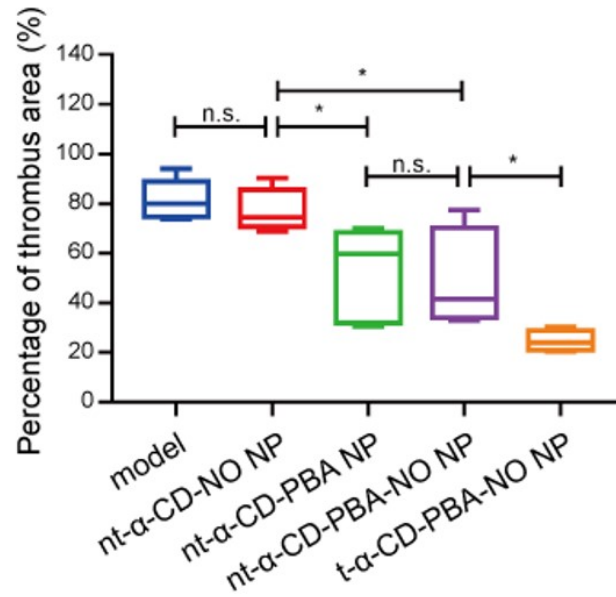

**Figure S10. Calculated thrombus area after different treatments. Data are presented as mean  $\pm$  SD (n=5). \* $p$  < 0.05, \*\* $p$  < 0.01, \*\*\* $p$  < 0.001, \*\*\*\* $p$  < 0.0001. The model referred to group with infusion of FeCl<sub>3</sub> solution.**

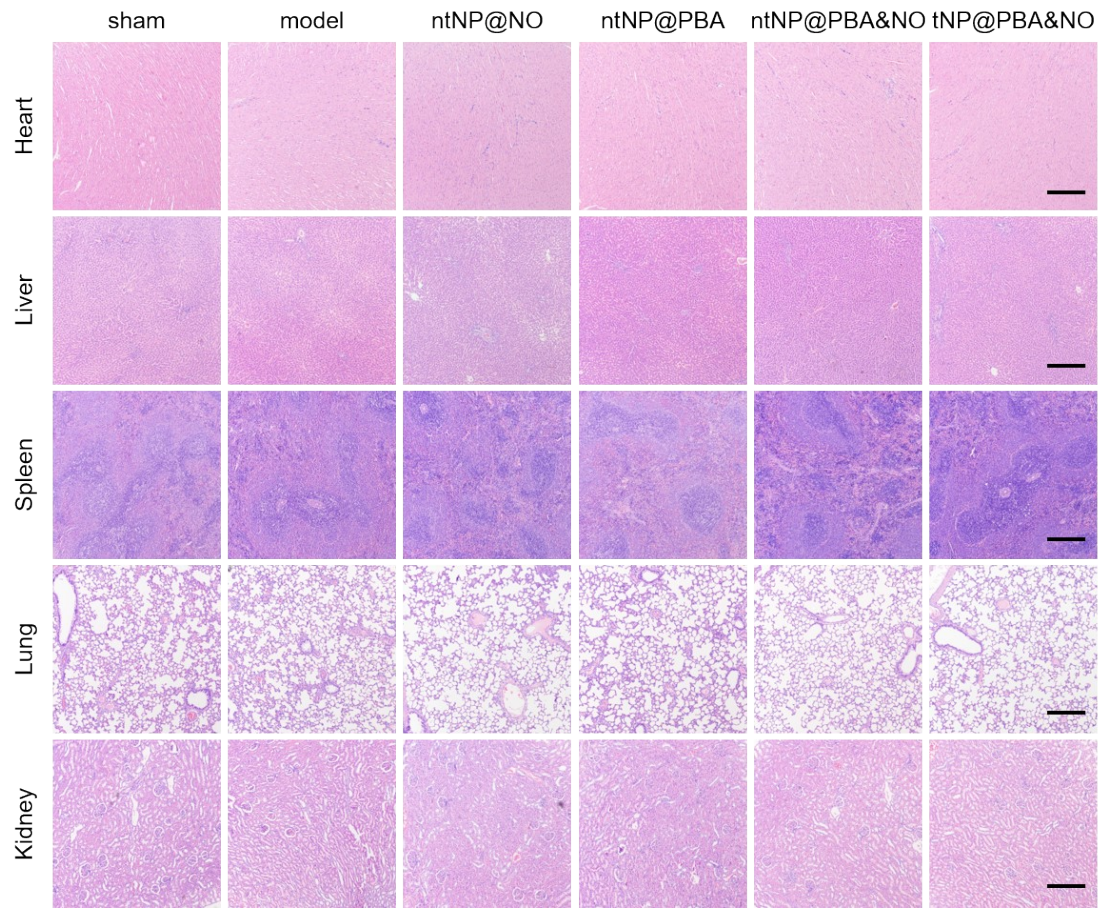

**Figure S11. Images of H&E staining of major organs after treated with different nanoprodruug. The model referred to group with carotid balloon injury.**

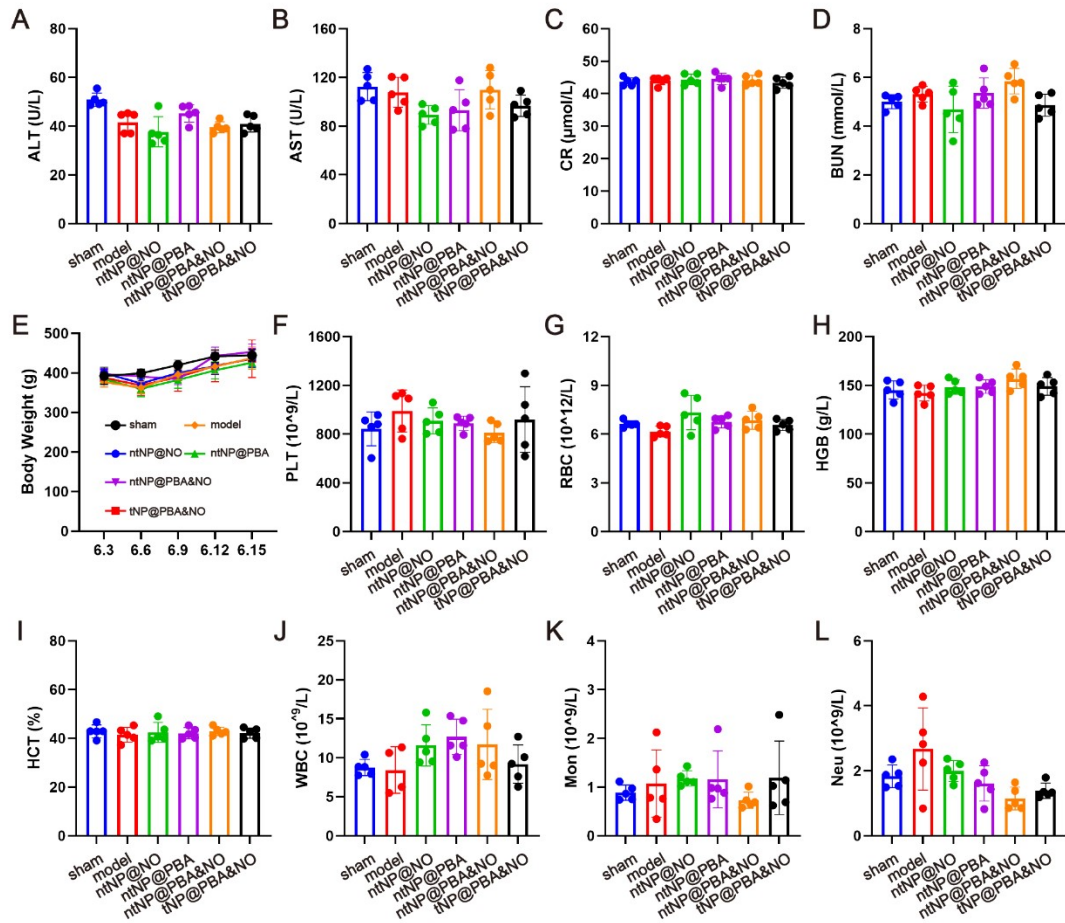

**Figure S12. CBC, CMP and body weight profiles after different treatments**

| Name of Nanoparticles | NO releasing | ROS responsiveness | Targeting ability |
|-----------------------|--------------|--------------------|-------------------|
| NP@PBA                | No           | Yes                | No                |
| NP@NO                 | Yes          | No                 | No                |
| NP@PBA&NO             | Yes          | Yes                | No                |
| nt NP@PBA             | No           | Yes                | No                |
| nt NP@NO              | Yes          | No                 | No                |
| nt NP@PBA&NO          | Yes          | Yes                | No                |
| t NP@PBA&NO           | Yes          | Yes                | Yes               |

**Table S1. Characteristic summary of of different nanoparticles.**
